# Supplementary material for: Exploring processing–structure–property relationships of chemically precipitated strontium silicate particles for medical applications
Source: Royal Society of Chemistry journal article supplement (doi:10.1039/d4tb02656j), 2025-01-01
Supplement: d4tb02656j1.pdf [file d4tb02656j1.pdf]

### Supplementary data

## Exploring processing-structure-property relationships of chemically precipitated strontium silicate particles for medical applications

Yun-Ru Huang<sup>a</sup>, Shinn-Jyh Ding<sup>a,b,c\*</sup>

<sup>a</sup> Institute of Oral Science, Chung Shan Medical University, Taichung 402, Taiwan.

<sup>b</sup> Department of Stomatology, Chung Shan Medical University Hospital, Taichung 402, Taiwan

<sup>c</sup> School of Dentistry, Chung Shan Medical University, Taichung 402, Taiwan

E-mail: sjding@csmu.edu.tw; Fax: +886-4-24759065; Tel: +886-4-24718668 ext. 55529

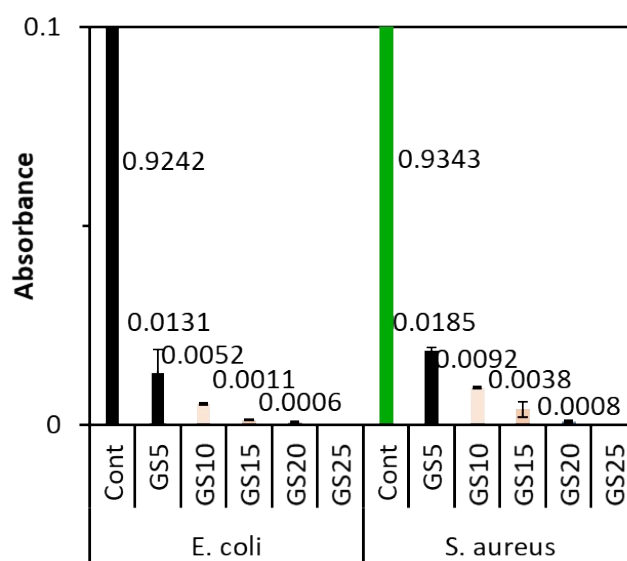

**Fig. S1.** Turbidity of GS with different concentrations (5, 10, 15, 20, and 25  $\mu\text{g/mL}$ ) after culture with *E. coli* and *S. aureus* for 24 h. The number is the detected absorbance. For the sample code, for example, the GS20 code means using 20  $\mu\text{g}$  GS for the testing.

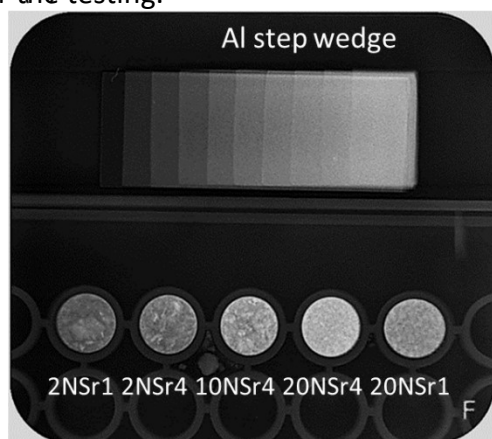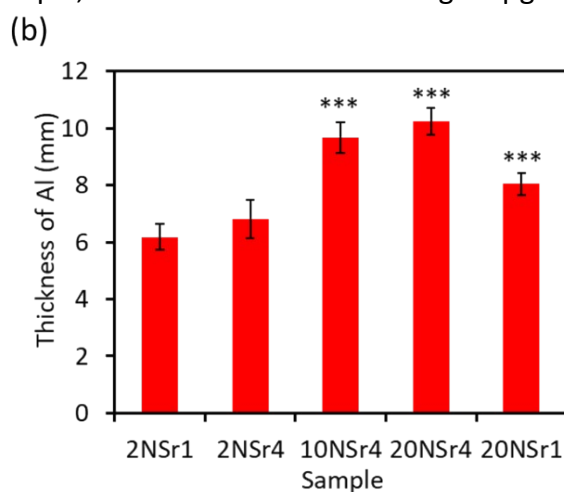

**Fig. S2.** (a) X-ray radiographs of Al step wedge and (b) corresponding thickness (mm) of various samples as a marker of radiopacity. The asterisk represents a statistically significant difference (\*\*\*,  $p < 0.001$ ) from 2NSr1.

| Cont | GS | Amount | 2NSr1 | 2NSr4 | 10NSr4 | 20NSr4 | 20NSr1 |
|------|----|--------|-------|-------|--------|--------|--------|
|      |    | 100 mg |       |       |        |        |        |
|      |    | 150 mg |       |       |        |        |        |
|      |    | 200 mg |       |       |        |        |        |
|      |    | 250 mg |       |       |        |        |        |
|      |    | 300 mg |       |       |        |        |        |

**Fig. S3.** Image of MBC determination of SrSi powders against *E. coli*.

| Cont | GS | Amount | 2NSr1 | 2NSr4 | 10NSr4 | 20NSr4 | 20NSr1 |
|------|----|--------|-------|-------|--------|--------|--------|
|      |    | 100 mg |       |       |        |        |        |
|      |    | 150 mg |       |       |        |        |        |
|      |    | 200 mg |       |       |        |        |        |
|      |    | 250 mg |       |       |        |        |        |
|      |    | 300 mg |       |       |        |        |        |

**Fig. S4.** Image of MBC determination of SrSi powders against *S. aureus*.

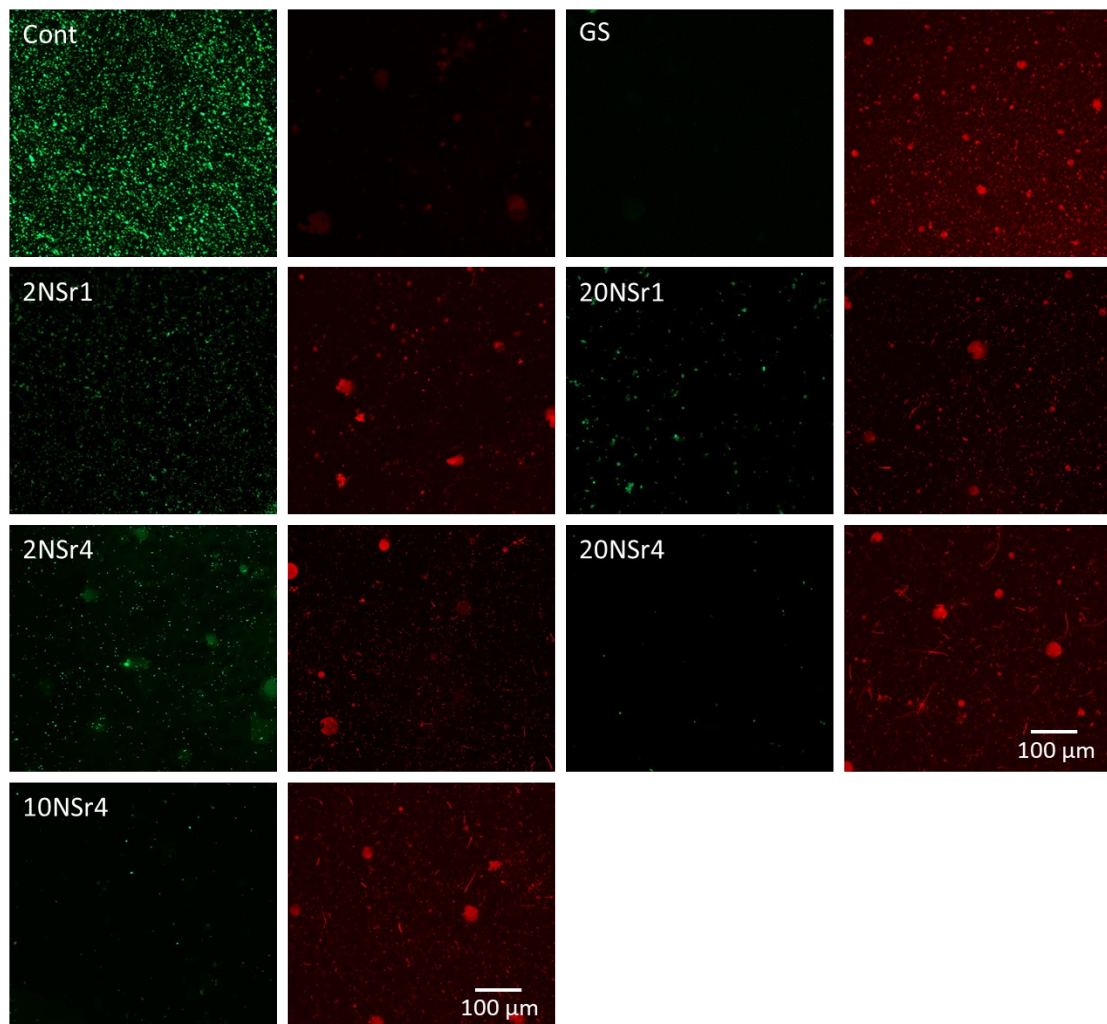

**Fig. S5.** Viability staining of *E. coli* exposed to control medium, GS, 2NSr1, 2NSr4, 10NSr4, 20NSr1, and 20NSr4. Viable bacteria are labeled green, and dead bacteria are labeled red.

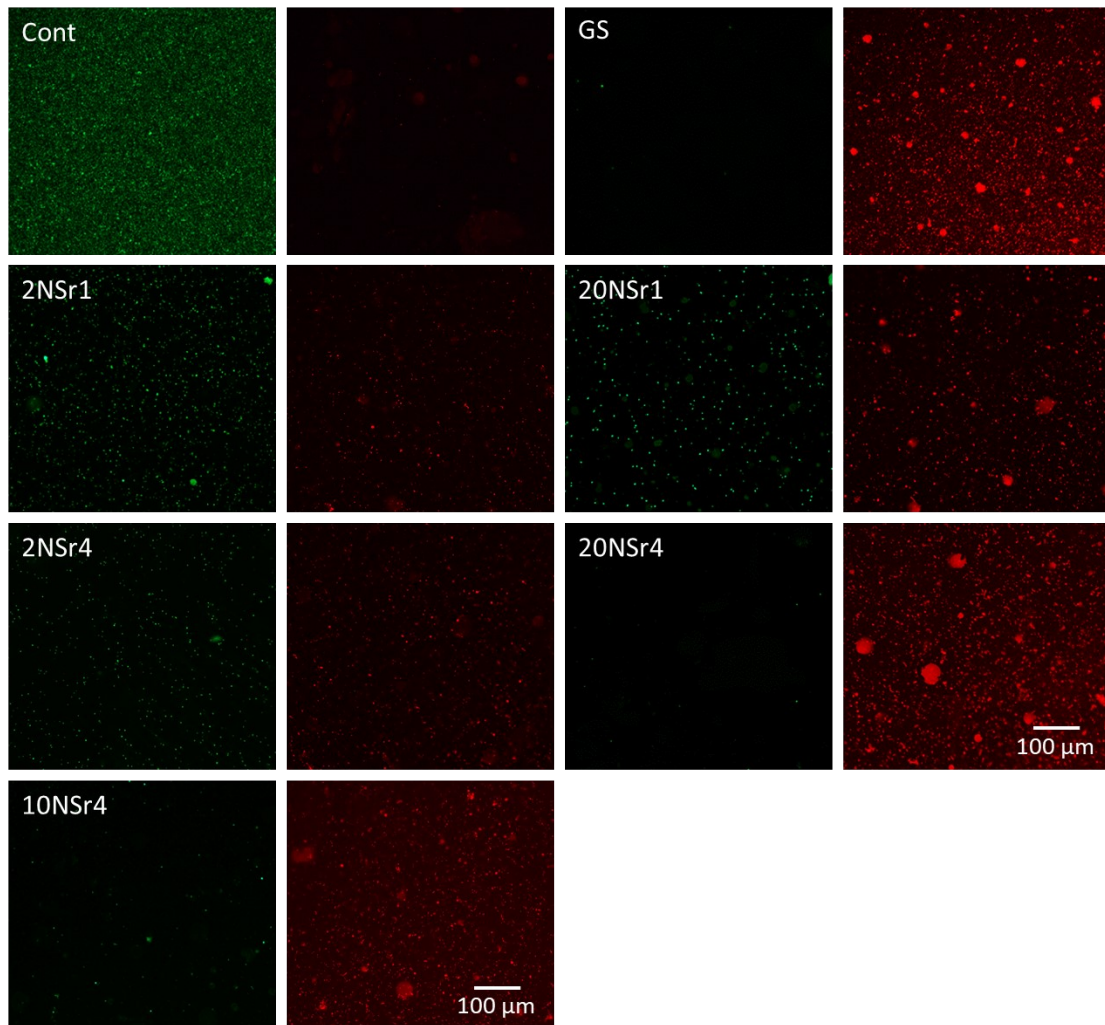

**Fig. S6.** Viability staining of *S. aureus* exposed to control medium, GS, 2NSr1, 2NSr4, 10NSr4, 20NSr1, and 20NSr4. Viable bacteria are labeled green, and dead bacteria are labeled red.

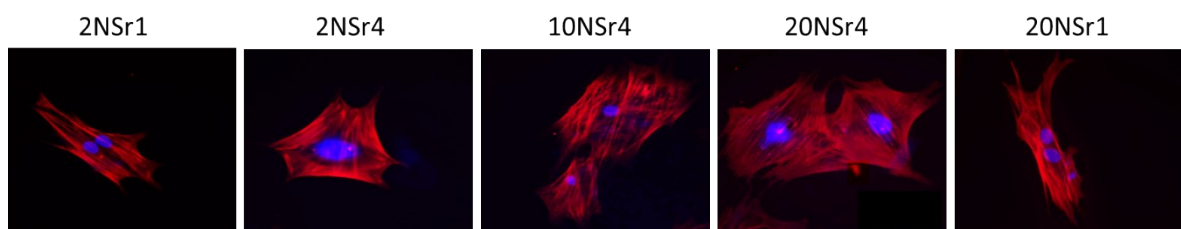

**Fig. S7.** Cytoskeleton staining for hMSC culture on the specimens for 1 day without the osteogenic differentiation agents. Cells were stained for nuclei (blue) and actin cytoskeleton (red).

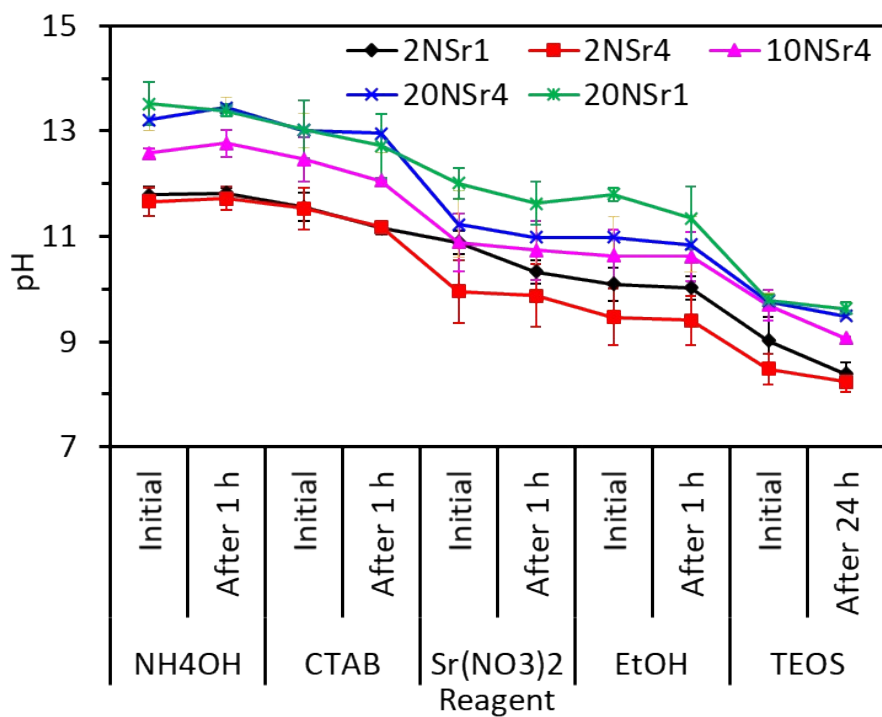

**Fig. S8.** Changes in the solution pH at the initial stage and after mixing for a specific time during the preparation process. The pH was recorded with a digital pH meter (pH 6175; JENCO, San Diego, CA, USA)
